# Supplementary material for: Gliadin Nanoparticles Containing Doxorubicin Hydrochloride: Characterization and Cytotoxicity
Source: MDPI journal article supplement (doi:10.3390/pharmaceutics15010180), 2023-01-04
Supplement: s1 [file s1]

# Supplementary Materials: Gliadin nanoparticles containing doxorubicin hydrochloride: characterization and cytotoxicity

Silvia Voci, Agnese Gagliardi, Nicola Ambrosio, Maria Cristina Salvatici, Massimo Fresta and Donato Cosco

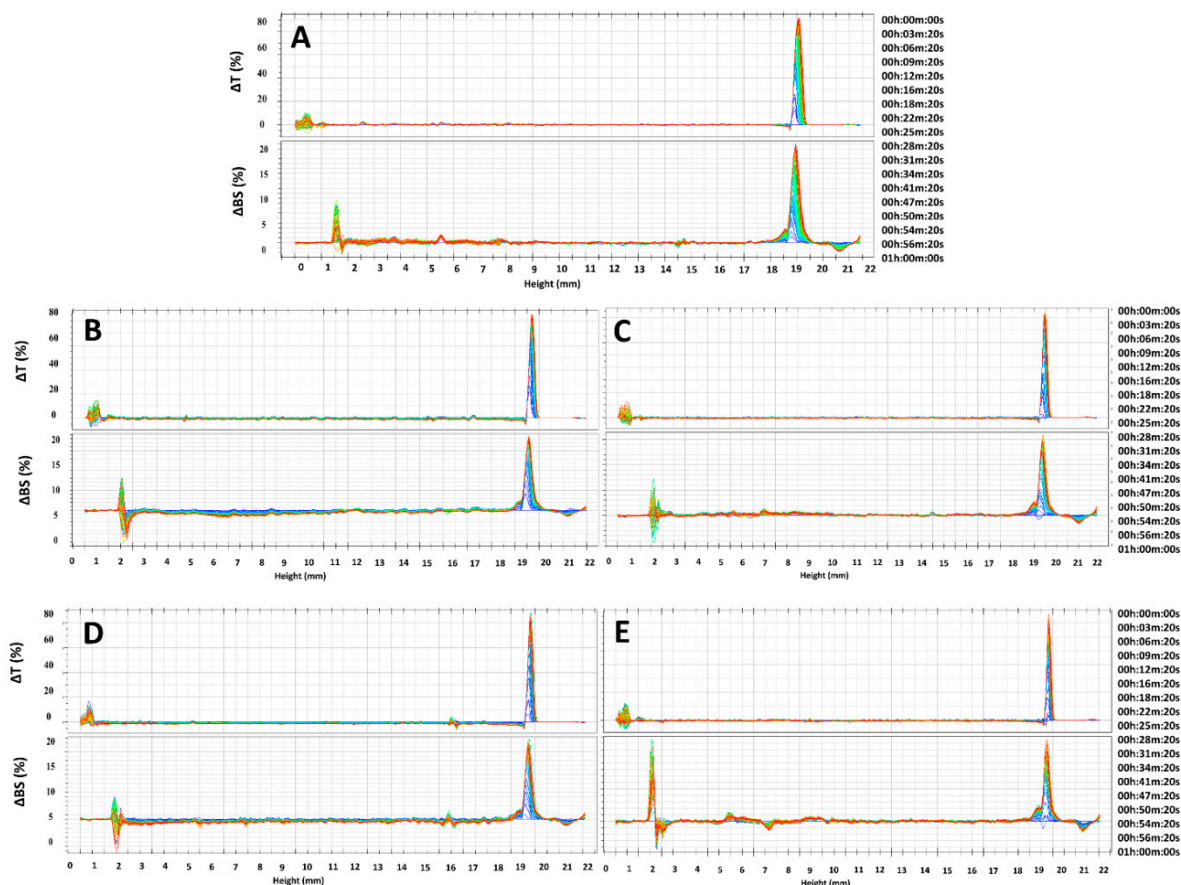

**Figure S1.**  $\Delta T$  and  $\Delta BS$  profiles of (A) empty GNPs and (B-E) DOX-loaded GNPs as a function of the drug concentration and incubation time. (B) 0.2 mg/mL; (C) 0.4 mg/mL; (D) 0.6 mg/mL and (E) 0.8 mg/mL. The analysis was performed at 25 °C for one hour.

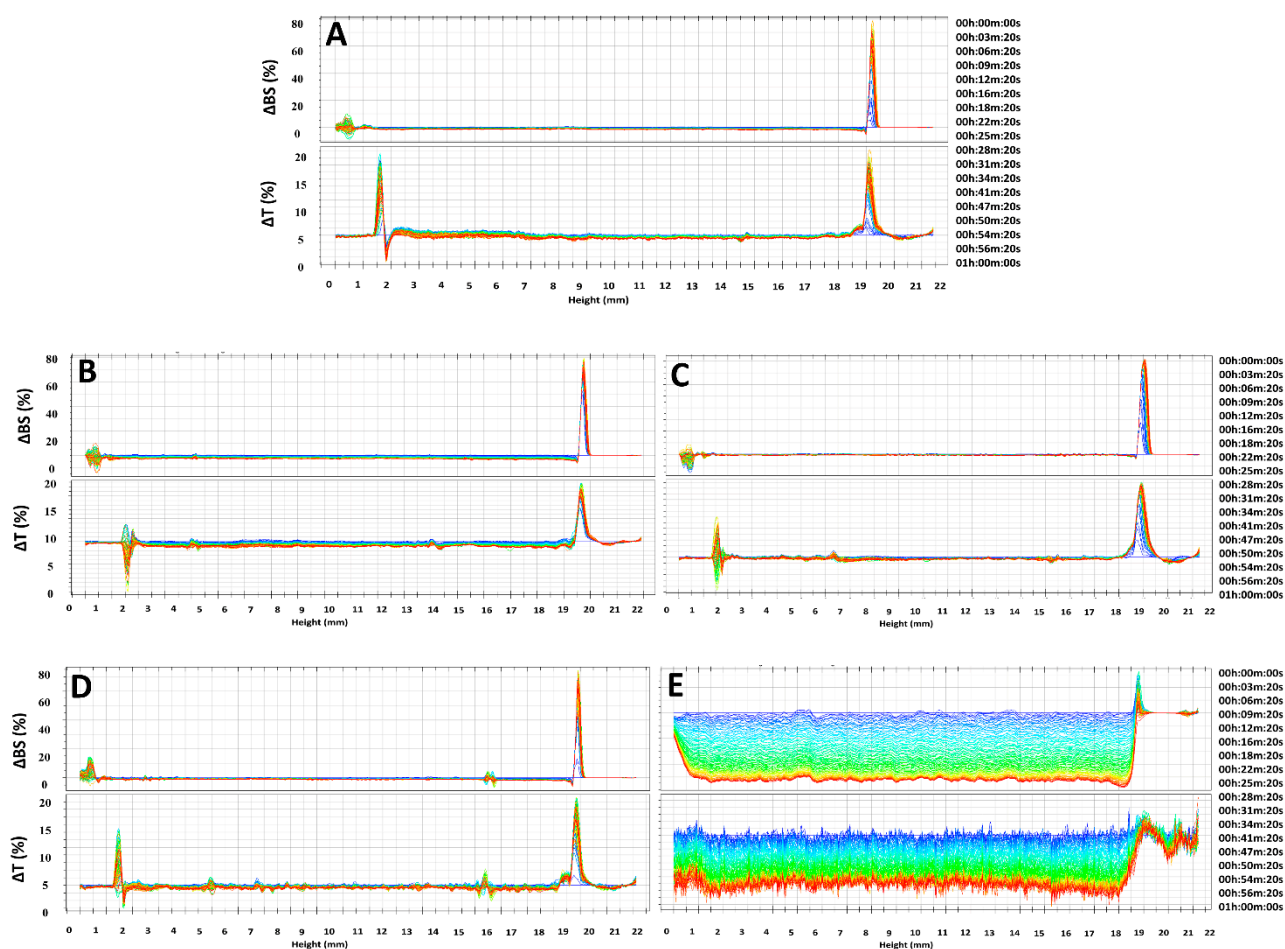

**Figure S2.**  $\Delta T$  and  $\Delta BS$  profiles of (A) empty GNPs and (B-E) DOX-loaded GNPs as a function of the drug concentration and incubation time. (B) 0.2 mg/mL; (C) 0.4 mg/mL; (D) 0.6 mg/mL and (E) 0.8 mg/mL. The analysis was performed at 37 °C for one hour.

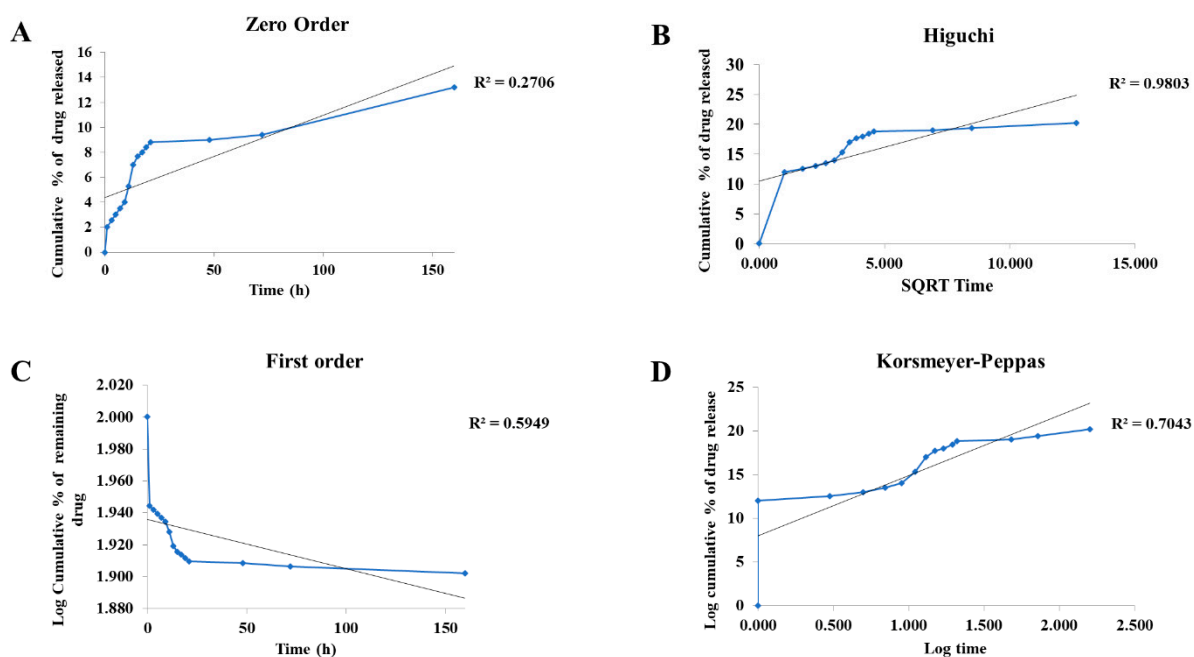

**Figure S3.** Drug release kinetics of DOX from DOX-loaded GNPs (600 µg/mL of drug) evaluated in physiological conditions and fitted against (A) Zero order, (B) Higuchi, (C) First order and (D) Korsmeyer-Peppas mathematical models. SQRT: Square root of time.

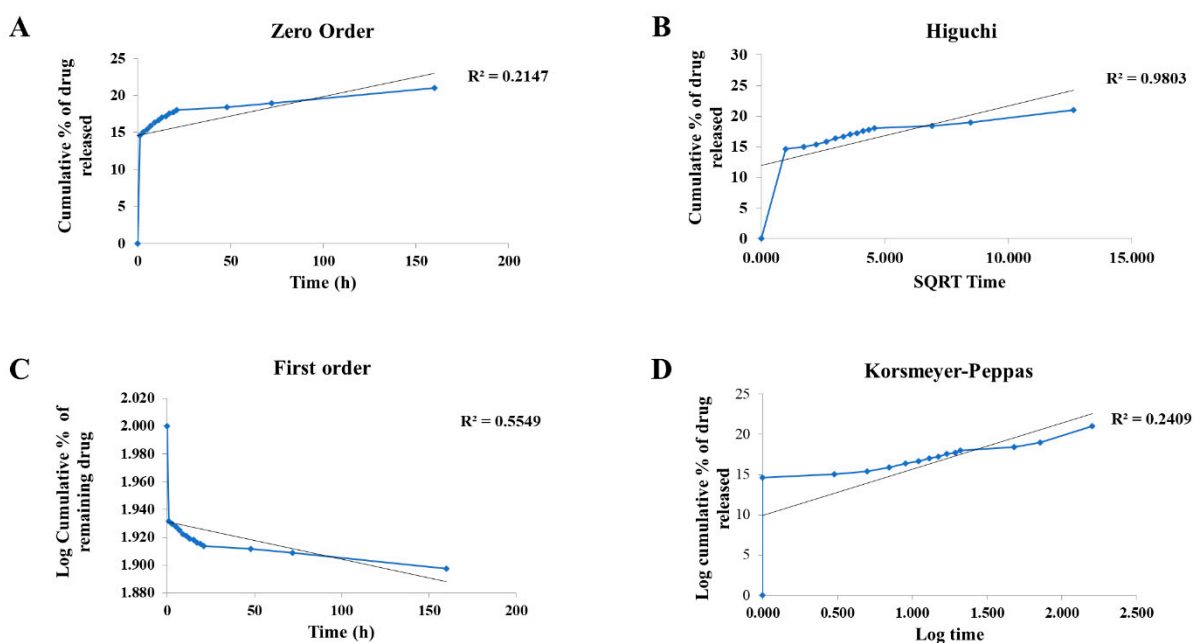

**Figure S4.** Drug release kinetics of DOX from DOX-loaded GNPs (600 µg/mL of drug) evaluated in simulated tumor conditions and fitted against (A) Zero order, (B) Higuchi, (C) First order and (D) Korsmeyer-Peppas mathematical models. SQRT: Square root of time.
